# Supplementary material for: Secondary organic aerosol association with cardiorespiratory disease mortality in the United States
Source: PubMed Central journal article supplement (PMC8677800; doi:10.1038/s41467-021-27484-1), 2021-12-16
Supplement: 41467_2021_27484_MOESM1_ESM.pdf [file 41467_2021_27484_MOESM1_ESM.pdf]

Supplementary Information for:

# Secondary organic aerosol association with cardiorespiratory disease mortality in the United States

Havala O. T. Pye,<sup>1\*</sup> Cavin K. Ward-Caviness,<sup>1</sup> Ben N. Murphy,<sup>1</sup> K. Wyatt Appel,<sup>1</sup>

Karl M. Seltzer<sup>2</sup>

<sup>1</sup>Office of Research and Development, US Environmental Protection Agency, 109 TW  
Alexander Dr, Research Triangle Park, NC 27711

<sup>2</sup>Oak Ridge Institute for Science and Education Postdoctoral Fellow in the Office of Research  
and Development, US Environmental Protection Agency, 109 TW Alexander Dr, Research  
Triangle Park, NC 27711

\*Correspondence to: [pye.havala@epa.gov](mailto:pye.havala@epa.gov)

Total Pages: 24  
Number of Tables: 10  
Number of Figures: 6

## Supplementary Note 1: Additional sensitivity tests in statistical models

A state specific indicator was also considered but not included in main text results since many confounders from CHR 2018 were created with a statistical model that included a state-level factor, including the state factor led to increased error in the total PM<sub>2.5</sub> fitted coefficient from 0.47 to 0.60 deaths per 100,000 people on a 1 µg m<sup>-3</sup> basis, and SOA contributions are expected to vary on a state to state basis due to differences in precursor emissions from vegetation as well as combustion sources. The results containing the state factor are available in the supplemental data archive and include an “ST” label in the notes.

Joint exposure to O<sub>3</sub> and NO<sub>2</sub> was considered in a sensitivity analysis (Supplementary Figure 2) but increased the standard error for the PM<sub>2.5</sub> coefficient from 0.47 to 0.74 deaths per 100,000 people on a 1 µg m<sup>-3</sup> basis (Supplementary Table 5). Since including O<sub>3</sub> and NO<sub>2</sub> in multiple regression resulted in less precise estimates of the PM<sub>2.5</sub> mortality effect and positive associations between PM<sub>2.5</sub> and death rates were independent of these gaseous pollutants, O<sub>3</sub> and NO<sub>2</sub> were generally excluded from statistical models.

Multicollinearity between confounders was examined in the single pollutant SOA model for the contiguous U.S. One confounder had variance inflation factor (VIF) larger than 10 (non-hispanic white fraction, VIF=11.6). Removing the confounder variable with VIF>10 resulted in a minor decrease in the magnitude of association between SOA and CR mortality rates (from 7.79 to 6.11 additional deaths per 100,000 in population for an IQR increase in concentration). SOA remained statistically significant in its association with CR mortality rates.

Supplementary Figures 4 and 5 include additional statistical model results for two subcomponents of SOA<sub>BVOC</sub>: SOA<sub>ISOPRENE</sub> and SOA<sub>TERPENE</sub>. The multipollutant model shown in Supplementary Figure 5 includes the entire PM<sub>2.5</sub> composition with refinement of SOA subcomponents into SOA<sub>ISOPRENE</sub>, SOA<sub>TERPENE</sub>, and SOA<sub>AVOC</sub>. The MP model in Supplementary Figure 5 is the same as MP SOA in the main text except SOA<sub>BVOC</sub> is replaced with SOA<sub>ISOPRENE</sub> and SOA<sub>TERPENE</sub>.

**Supplementary Table 1:** Summary of PM<sub>2.5</sub> component, confounder, and outcome values for counties with complete data across the contiguous (US, n=2,708) and in the southeastern (SE, n=646) United States. Detailed descriptions of the components are available in Supplementary Table 2. Additional information for the outcome and confounders is available in Supplementary Table 3. Minimum, maximum, and standard deviation (Std Dev) are for the contiguous US. Values are reported with 3 significant figures except for PM<sub>2.5</sub> components which are rounded to the hundredths of a  $\mu\text{g m}^{-3}$ .

|                                          | Units                 | Minimum | Maximum | Std Dev | US Mean | US IQR | SE Mean | SE IQR |
|------------------------------------------|-----------------------|---------|---------|---------|---------|--------|---------|--------|
| <b>PM<sub>2.5</sub> Components</b>       |                       |         |         |         |         |        |         |        |
| Total                                    | $\mu\text{g m}^{-3}$  | 2.06    | 14.30   | 1.89    | 6.50    | 2.68   | 7.84    | 1.14   |
| OA                                       | $\mu\text{g m}^{-3}$  | 0.68    | 5.93    | 1.10    | 2.86    | 1.63   | 4.03    | 0.96   |
| Dust                                     | $\mu\text{g m}^{-3}$  | 0.40    | 6.13    | 0.52    | 1.49    | 0.69   | 1.60    | 0.46   |
| SO <sub>4</sub>                          | $\mu\text{g m}^{-3}$  | 0.39    | 1.62    | 0.23    | 0.93    | 0.29   | 1.03    | 0.14   |
| NH <sub>4</sub> NO <sub>3</sub>          | $\mu\text{g m}^{-3}$  | 0.13    | 2.25    | 0.39    | 0.76    | 0.46   | 0.63    | 0.31   |
| Soot                                     | $\mu\text{g m}^{-3}$  | 0.06    | 1.52    | 0.13    | 0.27    | 0.13   | 0.32    | 0.09   |
| Sea spray                                | $\mu\text{g m}^{-3}$  | 0.07    | 1.16    | 0.12    | 0.18    | 0.09   | 0.23    | 0.12   |
| <b>PM<sub>2.5</sub> OA Subcomponents</b> |                       |         |         |         |         |        |         |        |
| OC                                       | $\mu\text{gC m}^{-3}$ | 0.36    | 3.95    | 0.63    | 1.58    | 0.92   | 2.24    | 0.60   |
| POA                                      | $\mu\text{g m}^{-3}$  | 0.16    | 4.31    | 0.27    | 0.66    | 0.27   | 0.77    | 0.22   |
| SOA                                      | $\mu\text{g m}^{-3}$  | 0.53    | 4.60    | 0.94    | 2.20    | 1.44   | 3.26    | 0.82   |
| SOA <sub>AVOC</sub>                      | $\mu\text{g m}^{-3}$  | 0.23    | 2.89    | 0.39    | 1.14    | 0.54   | 1.43    | 0.21   |
| SOA <sub>BVOC</sub>                      | $\mu\text{g m}^{-3}$  | 0.26    | 3.31    | 0.66    | 1.06    | 0.91   | 1.83    | 0.72   |
| SOA <sub>TERPENE</sub>                   | $\mu\text{g m}^{-3}$  | 0.13    | 2.40    | 0.46    | 0.59    | 0.51   | 1.12    | 0.65   |
| SOA <sub>ISOPRENE</sub>                  | $\mu\text{g m}^{-3}$  | 0.11    | 1.07    | 0.23    | 0.47    | 0.41   | 0.71    | 0.18   |
| <b>Other pollutants</b>                  |                       |         |         |         |         |        |         |        |
| NO <sub>2</sub>                          | ppb                   | 0.152   | 19.6    | 1.55    | 2.18    | 1.33   | 2.14    | 0.985  |
| O <sub>3</sub>                           | ppb                   | 19.5    | 41.6    | 2.50    | 30.8    | 2.36   | 30.1    | 2.69   |
| <b>Environmental Variables</b>           |                       |         |         |         |         |        |         |        |
| Relative Humidity                        | %                     | 30.0    | 82.2    | 7.39    | 68.9    | 6.55   | 70.3    | 4.55   |
| Temperature                              | K                     | 274     | 298     | 4.25    | 287     | 6.53   | 291     | 3.72   |
| Presence of drinking water violation     | 1 or 0                | 0       | 1       | 0.498   | 0.450   | 1      | 0.282   | 1      |
| <b>Health Outcome</b>                    |                       |         |         |         |         |        |         |        |
| Cardiorespiratory deaths                 | Deaths per 100,000    | 95.5    | 779     | 80.7    | 330     | 103    | 374     | 111    |

|                                                   | Units                        | Minimum  | Maximum  | Std Dev  | US Mean  | US IQR   | SE Mean  | SE IQR   |
|---------------------------------------------------|------------------------------|----------|----------|----------|----------|----------|----------|----------|
| <b>Behavioral, Social, and Economic Variables</b> |                              |          |          |          |          |          |          |          |
| Smoking adults                                    | Fraction of adult population | 0.0674   | 0.332    | 0.0347   | 0.178    | 0.0502   | 0.203    | 0.0374   |
| Obese adults                                      | Fraction of adult population | 0.128    | 0.478    | 0.0448   | 0.314    | 0.054    | 0.333    | 0.048    |
| Physically inactive adults                        | Fraction of adult population | 0.098    | 0.444    | 0.0518   | 0.267    | 0.068    | 0.295    | 0.0587   |
| Excessive drinking                                | Fraction of adult population | 0.0927   | 0.294    | 0.0324   | 0.175    | 0.0454   | 0.151    | 0.0286   |
| Number physicians                                 | per 100,000                  | 0        | 0.00453  | 0.000327 | 0.000556 | 0.000383 | 0.00049  | 0.000316 |
| Diabetes patients                                 | Fraction of adult population | 0.227    | 0.977    | 0.0587   | 0.848    | 0.0572   | 0.855    | 0.0439   |
| Adults with post-secondary education              | Fraction of adult population | 0.193    | 0.897    | 0.113    | 0.573    | 0.16     | 0.522    | 0.143    |
| Unemployed                                        | Fraction of adult population | 0.0175   | 0.235    | 0.0177   | 0.0524   | 0.0205   | 0.0593   | 0.0177   |
| Income inequality index                           | Ratio                        | 2.97     | 8.93     | 0.709    | 4.52     | 0.841    | 4.87     | 0.9      |
| Social associations                               | per 10,000                   | 0.944    | 68.3     | 6.3      | 13.5     | 6.75     | 11.3     | 5.12     |
| Violent crime offenses                            | per 100,000                  | 0        | 1720     | 189      | 251      | 211      | 312      | 272      |
| Housing problems                                  | Fraction of households       | 0.0269   | 0.391    | 0.0419   | 0.145    | 0.0503   | 0.158    | 0.0434   |
| Limited health food access                        | Fraction of population       | 0        | 0.593    | 0.0648   | 0.0769   | 0.0644   | 0.0694   | 0.0688   |
| Uninsured adults                                  | Fraction of population       | 0.0262   | 0.434    | 0.0613   | 0.14     | 0.0896   | 0.164    | 0.0557   |
| Other health providers                            | per 100,000                  | 0        | 0.0134   | 0.000492 | 0.000707 | 0.000467 | 0.000735 | 0.000475 |
| Household income                                  | Dollars                      | 24200    | 135000   | 12900    | 49900    | 14200    | 43800    | 11400    |
| <b>Demographic Variables</b>                      |                              |          |          |          |          |          |          |          |
| Population <18 years of age                       | Fraction of population       | 0.0707   | 0.366    | 0.0326   | 0.224    | 0.0369   | 0.22     | 0.034    |
| Population ≥65 years of age                       | Fraction of population       | 0.0463   | 0.563    | 0.0442   | 0.183    | 0.0517   | 0.179    | 0.0421   |
| American Indian and Alaskan Native                | Fraction of population       | 0.000933 | 0.829    | 0.0575   | 0.019    | 0.00897  | 0.00737  | 0.00298  |
| Asian                                             | Fraction of population       | 0        | 0.365    | 0.025    | 0.0149   | 0.00962  | 0.0112   | 0.0088   |
| Pacific Islander                                  | Fraction of population       | 0        | 0.0277   | 0.00171  | 0.00106  | 0.000814 | 0.000943 | 0.000816 |
| Hispanic                                          | Fraction of population       | 0.00502  | 0.963    | 0.135    | 0.0942   | 0.0755   | 0.0562   | 0.0429   |
| Non-hispanic White                                | Fraction of population       | 0.0281   | 0.98     | 0.192    | 0.771    | 0.266    | 0.717    | 0.316    |
| Females                                           | Fraction of population       | 0.278    | 0.565    | 0.0206   | 0.500    | 0.0148   | 0.506    | 0.0132   |
| Rural population                                  | Fraction of population       | 0        | 1        | 0.300    | 0.553    | 0.470    | 0.590    | 0.440    |
| <b>Other</b>                                      |                              |          |          |          |          |          |          |          |
| Population                                        | People                       | 669      | 10100000 | 348000   | 114000   | 64800    | 96400    | 65200    |

**Supplementary Table 2:** Aggregated CMAQ PM<sub>2.5</sub> components. CMAQ-predicted size distributions and the fraction of the Aitken, accumulation, and coarse modes (PM25AT, PM25AC, and PM25CO respectively) below 2.5 µm in diameter were used to calculate the mass in PM<sub>2.5</sub>. [1] denotes the species is from the ACONC file. [2] denotes the quantity is from the APMDIAG file. See <https://github.com/USEPA/CMAQ> for CMAQ documentation.

| Component Name                  | Description                                                                                    | Subcomponent Species                                               | CMAQ Internal Species                                                                                                                                                                                                                                                                                                                                                                                                                                                                                                 |
|---------------------------------|------------------------------------------------------------------------------------------------|--------------------------------------------------------------------|-----------------------------------------------------------------------------------------------------------------------------------------------------------------------------------------------------------------------------------------------------------------------------------------------------------------------------------------------------------------------------------------------------------------------------------------------------------------------------------------------------------------------|
| OA                              | all primary and secondary organic aerosol                                                      | SOA + POA                                                          | (ALVPO1I[1]+ASVPO1I[1]+ASVPO2I[1]+APOCI[1]+APNCOMI[1]<br>+ALVOO1I[1]+ALVOO2I[1]+ASVOO1I[1]+SVOO2I[1])*PM25AT[2]<br>+(ALVPO1J[1]+ASVPO1J[1]+ASVPO2J[1]+APOCJ[1]+ASVPO3J[1]+AIVPO1J[1]<br>+APNCOMJ[1]+AISO1J[1]+AISO2J[1]+AISO3J[1]<br>+AMT1J[1]+AMT2J[1]+AMT3J[1]+AMT4J[1]+AMT5J[1]+AMT6J[1]<br>+AMTNO3J[1]+AMTHYDJ[1]+AGLYJ[1]+ASQTJ[1]<br>+AORGJ[1]+AOLGBJ[1]+AOLGAJ[1]<br>+ALVOO1J[1]+ALVOO2J[1]+ASVOO1J[1]+ASVOO2J[1]+ASVOO3J[1]<br>+APCSOJ[1]+AAVB1J[1]+AAVB2J[1]+AAVB3J[1]+AAVB4J[1])*PM25AC[2]                  |
| Sea spray                       | Chloride, sodium, and magnesium                                                                | Cl + Na + Mg                                                       | ACLI[1]*PM25AT[2]+ACLJ[1]*PM25AC[2]+ACLK[1]*PM25CO[2]+<br>ANAI[1]*PM25AT[2]+ANAJ[1]*PM25AC[2]<br>+(0.8373*ASEACAT[1]+0.0626*ASOIL[1]+0.0023*ACORS[1])*PM25CO[2]+<br>AMGJ[1]*PM25AC[2]+(0.0997*ASEACAT[1]+0.0170*ASOIL[1]+0.0032*ACORS[1])*PM25CO[2]                                                                                                                                                                                                                                                                   |
| SO <sub>4</sub>                 | total particulate sulfate (sulfate and bisulfate forms)                                        | sulfate                                                            | ASO4I[1]*PM25AT[2]+ASO4J[1]*PM25AC[2]+ASO4K[1]*PM25CO[2]                                                                                                                                                                                                                                                                                                                                                                                                                                                              |
| Dust                            | Species associated with dust (e.g. Ca, Si) and other PM <sub>2.5</sub> not otherwise speciated | Ca + Fe + Si + Ti + Mn + Al + other unspciated mass (UNSPCRS+OTHR) | ACAJ[1]*PM25AC[2]+(0.0320*ASEACAT[1]+0.0838*ASOIL[1]+0.0562*ACORS[1])*PM25CO[2]+<br>AOTHRI[1]*PM25AT[2]+AOTHRJ[1]*PM25AC[2]+<br>AFEJ[1]*PM25AC[2]+<br>ASIJ[1]*PM25AC[2]+<br>ATIJ[1]*PM25AC[2]+<br>AMNJ[1]*PM25AC[2]+<br>AALJ[1]*PM25AC[2]+<br>(ASOIL[1]+ACORS[1]+ASEACAT[1]<br>-(0.8373*ASEACAT[1]+0.0626*ASOIL[1]+0.0023*ACORS[1])<br>-(0.0997*ASEACAT[1]+0.0170*ASOIL[1]+0.0032*ACORS[1])<br>-(0.0310*ASEACAT[1]+0.0242*ASOIL[1]+0.0176*ACORS[1])<br>-(0.0320*ASEACAT[1]+0.0838*ASOIL[1]+0.0562*ACORS[1])*PM25CO[2] |
| NH <sub>4</sub> NO <sub>3</sub> | Ammonium and nitrate                                                                           | ammonium (NH <sub>4</sub> ) and nitrate (NO <sub>3</sub> )         | ANH4I[1]*PM25AT[2]+ANH4J[1]*PM25AC[2]+ANH4K[1]*PM25CO[2]+<br>ANO3I[1]*PM25AT[2]+ANO3J[1]*PM25AC[2]+ANO3K[1]*PM25CO[2]                                                                                                                                                                                                                                                                                                                                                                                                 |
| Soot                            | Elemental carbon (EC) and potassium (K)                                                        | EC + K                                                             | AECI[1]*PM25AT[2]+AECJ[1]*PM25AC[2]+<br>AKJ[1]*PM25AC[2]+(0.0310*ASEACAT[1]+0.0242*ASOIL[1]+0.0176*ACORS[1])*PM25CO[2]                                                                                                                                                                                                                                                                                                                                                                                                |

| Component Name          | Description                                                                                    | Subcomponent Species                                                                                                                                                   | CMAQ Internal Species                                                                                                                                                                                                                                                                                                                                      |
|-------------------------|------------------------------------------------------------------------------------------------|------------------------------------------------------------------------------------------------------------------------------------------------------------------------|------------------------------------------------------------------------------------------------------------------------------------------------------------------------------------------------------------------------------------------------------------------------------------------------------------------------------------------------------------|
| SOA                     | Secondary organic aerosol (formed in atmosphere)                                               | all SOA = SOA <sub>BVOC</sub> + SOA <sub>AVOC</sub>                                                                                                                    | (ALV001I[1]+ALV002I[1]+ASV001I[1]+ASV002I[1])*PM25AT[2]<br>+(AISO1J[1]+AISO2J[1]+AISO3J[1]<br>+AMT1J[1]+AMT2J[1]+AMT3J[1]+AMT4J[1]+AMT5J[1]+AMT6J[1]<br>+AMTNO3J[1]+AMTHYDJ[1]+AGLYJ[1]+ASQTJ[1]+AORGCJ[1]+AOLGBJ[1]+AOLGAJ[1]<br>+ALV001J[1]+ALV002J[1]+ASV001J[1]+ASV002J[1]+ASV003J[1]<br>+APCSOJ[1]+AAVB1J[1]+AAVB2J[1]+AAVB3J[1]+AAVB4J[1])*PM25AC[2] |
| POA                     | Primary organic aerosol (emitted)                                                              | POA                                                                                                                                                                    | (ALVPO1I[1]+ASVPO1I[1]+ASVPO2I[1]+APOCI[1]+APNCOMI[1])*PM25AT[2]<br>+(ALVPO1J[1]+ASVPO1J[1]+ASVPO2J[1]+APOCJ[1]+ASVPO3J[1]+AIVPO1J[1]+APNCOMJ[1])*PM25AC[2]                                                                                                                                                                                                |
| SOA <sub>TERPENE</sub>  | Monoterpene (C <sub>10</sub> ) and sesquiterpene (C <sub>15</sub> ) SOA                        | sesquiterpene (SQT), monoterpene nitrate + hydrolysis product (MTN), and monoterpene photooxidation (MT) SOA                                                           | ASQTJ[1]*PM25AC[2]+<br>(AMTNO3J[1]+AMTHYDJ[1])*PM25AC[2]+<br>(AMT1J[1]+AMT2J[1]+AMT3J[1]+AMT4J[1]+AMT5J[1]+AMT6J[1])*PM25AC[2]                                                                                                                                                                                                                             |
| SOA <sub>ISOPRENE</sub> | Isoprene and correlated SOA including that from glyoxal, methylglyoxal, and biogenic oligomers | glyoxal+methylglyoxal SOA from aqueous uptake (GLYSOA), semivolatile isoprene SOA (ISOP), acid-catalyzed isoprene-epoxydiol SOA (IEPOX), and biogenic oligomers (OLGB) | (AORGCJ[1]+AGLYJ[1])*PM25AC[2]+<br>AOLGBJ[1]*PM25AC[2]+<br>(AISO1J[1]+AISO2J[1])*PM25AC[2]+<br>AISO3J[1]*PM25AC[2]                                                                                                                                                                                                                                         |
| SOA <sub>BVOC</sub>     | SOA from VOCs that are predominantly biogenic in origin                                        | SOA <sub>TERPENE</sub> + SOA <sub>ISOPRENE</sub>                                                                                                                       | see above                                                                                                                                                                                                                                                                                                                                                  |
| SOA <sub>AVOC</sub>     | anthropogenic-VOC derived SOA                                                                  | SOA from benzene, toluene, xylene, PAHs, long-chain alkanes, and other anthropogenic VOC sources                                                                       | (AAVB1J[1]+AAVB2J[1]+AAVB3J[1]+AAVB4J[1]+AOLGAJ[1])*PM25AC[2]<br>+(ALV001I[1]+ALV002I[1]+ASV001I[1]+ASV002I[1])*PM25AT[2]<br>+(ALV001J[1]+ALV002J[1]+ASV001J[1]+ASV002J[1]+ASV003J[1]+APCSOJ[1])*PM25AC[2]                                                                                                                                                 |

**Supplementary Table 3:** Confounders and other variables (variable names appear in supporting files available via data.gov) considered in statistical models. O<sub>3</sub> and NO<sub>2</sub> were only considered in some models.

| <b>Model Variable</b>                    | <b>Confounder Description</b>                                                                                                          | <b>Source</b>                            | <b>Original Data Source</b>                            | <b>Data Year</b> | <b>Units</b>                         |
|------------------------------------------|----------------------------------------------------------------------------------------------------------------------------------------|------------------------------------------|--------------------------------------------------------|------------------|--------------------------------------|
| Adult.smoking.raw.value.2018uw           | Adults that reported currently smoking every day or most days and have smoked at least 100 cigarettes                                  | County Health Rankings 2018 <sup>a</sup> | Behavioral Risk Factor Surveillance System (BRFSS)     | 2016             | Fraction of Adults                   |
| Adult.obesity.raw.value.2018uw           | Adults 20 and older with BMI $\geq$ 30 kg/m <sup>2</sup> based on reported height and weight                                           | County Health Rankings 2018              | CDC Diabetes Interactive Atlas/BRFSS                   | 2014             | Fraction of Adults                   |
| Physical.inactivity.raw.value.2018uw     | Adults 20 and older that report no leisure-time physical activity in past month                                                        | County Health Rankings 2018              | CDC Diabetes Interactive Atlas                         | 2014             | Fraction of Adults                   |
| Excessive.drinking.raw.value.2018uw      | Adults that report excessive drinking in last 30 days                                                                                  | County Health Rankings 2018              | BRFSS                                                  | 2016             | Fraction of Adults                   |
| Primary.care.physicians.raw.value.2018uw | Number of primary care physicians (PCP) in patient care per 100,000 in population                                                      | County Health Rankings 2018              | Area Health Resource File/American Medical Association | 2015             | Number physicians per 100,000 people |
| Diabetes.monitoring.raw.value.2018uw     | Diabetic fee-for-service Medicare patients age 65-75 whose blood sugar control was monitored in the past year using their HbA1C levels | County Health Rankings 2018              | Dartmouth Atlas of Health Care                         | 2014             | Fraction of Medicare Patients        |
| Some.college.raw.value.2018uw            | Adults age 25-44 with some post-secondary education                                                                                    | County Health Rankings 2018              | American Community Survey                              | 2012-2016        | Fraction of Adults 25-44             |
| Unemployment.raw.value.2018uw            | People ages 16+ unemployed and looking for work                                                                                        | County Health Rankings 2018              | Bureau of Labor Statistics                             | 2016             | Fraction                             |
| Income.inequality.raw.value.2018uw       | Ratio of income at the 80th percentile to income at the 20th percentile                                                                | County Health Rankings 2018              | American Community Survey                              | 2012-2016        | Ratio                                |
| Social.associations.raw.value.2018uw     | Number of membership associations per 10,000 people                                                                                    | County Health Rankings 2018              | County Business Patterns                               | 2015             | Number per 10,000                    |
| Violent.crime.raw.value.2018uw           | Number of violent crime offenses per 100,000 people                                                                                    | County Health Rankings 2018              | Uniform Crime Reporting – FBI                          | 2012-2014        | Number per 100,000                   |

| <b>Model Variable</b>                                      | <b>Confounder Description</b>                                                                                                       | <b>Source</b>               | <b>Original Data Source</b>                                                           | <b>Data Year</b> | <b>Units</b>                           |
|------------------------------------------------------------|-------------------------------------------------------------------------------------------------------------------------------------|-----------------------------|---------------------------------------------------------------------------------------|------------------|----------------------------------------|
| Drinking.water.violations.raw.value.2018uw                 | County affected by a water violation: 1-Yes, 0-No                                                                                   | County Health Rankings 2018 | Safe Drinking Water Information System                                                | 2016             | 1 or 0                                 |
| Severe.housing.problems.raw.value.2018uw                   | Households with at least 1 of 4 housing problems: overcrowding, high housing costs, lack of kitchen, or lack of plumbing facilities | County Health Rankings 2018 | Comprehensive Housing Affordability Strategy (CHAS) data                              | 2010-2014        | Fraction of households                 |
| Limited.access.to.healthy.foods.raw.value.2018uw           | Population that is low-income and not close to a grocery store                                                                      | County Health Rankings 2018 | USDA Food Environment Atlas                                                           | 2015             | Fraction of population                 |
| Uninsured.adults.raw.value.2018uw                          | Adults under age 65 without health insurance                                                                                        | County Health Rankings 2018 | Small Area Health Insurance Estimates                                                 | 2015             | Fraction of population age 18 to 64    |
| Other.primary.care.providers.raw.value.2018uw              | Primary care providers that are not physicians (nurse practitioners, physician assistants, clinical nurse specialists, etc).        | County Health Rankings 2018 | Centers for Medicare & Medicaid Services (CMS), National Provider Identification file | 2017             | Number of providers per 100,000 people |
| Median.household.income.raw.value.2018uw                   | Median income                                                                                                                       | County Health Rankings 2018 | Small Area Income and Poverty Estimates                                               | 2016             | Dollars                                |
| X..below.18.years.of.age.raw.value.2018uw                  | Population below 18 years of age                                                                                                    | County Health Rankings 2018 | Census Population Estimates Program                                                   | 2016             | Fraction of population                 |
| X..65.and.older.raw.value.2018uw                           | Population 65 years of age and older                                                                                                | County Health Rankings 2018 | Census Population Estimates Program                                                   | 2016             | Fraction of population                 |
| X..American.Indian.and.Alaskan.Native.raw.value.2018uw     | American Indian and Alaskan Native population                                                                                       | County Health Rankings 2018 | Census Population Estimates Program                                                   | 2016             | Fraction of population                 |
| X..Asian.raw.value.2018uw                                  | Asian population                                                                                                                    | County Health Rankings 2018 | Census Population Estimates Program                                                   | 2016             | Fraction of population                 |
| X..Native.Hawaiian.Other.Pacific.Islander.raw.value.2018uw | Native Hawaiian/Other Pacific Islander population                                                                                   | County Health Rankings 2018 | Census Population Estimates Program                                                   | 2016             | Fraction of population                 |



| <b>Model Variable</b>                  | <b>Confounder Description</b>                         | <b>Source</b>                               | <b>Original Data Source</b>                  | <b>Data Year</b> | <b>Units</b>           |
|----------------------------------------|-------------------------------------------------------|---------------------------------------------|----------------------------------------------|------------------|------------------------|
| X..Hispanic.raw.value.2018uw           | Hispanic population                                   | County Health Rankings 2018                 | Census Population Estimates Program          | 2016             | Fraction of population |
| X..Non.Hispanic.white.raw.value.2018uw | Non-Hispanic White population                         | County Health Rankings 2018                 | Census Population Estimates Program          | 2016             | Fraction of population |
| X..Females.raw.value.2018uw            | Female population                                     | County Health Rankings 2018                 | Census Population Estimates Program          | 2016             | Fraction of population |
| X..Rural.raw.value.2018uw              | Population in rural area (census tract <2,500 people) | County Health Rankings 2018                 | Census Population Estimates Program          | 2010             | Fraction of population |
| RH.percent.cmaq                        | Relative Humidity                                     | CMAQ Modeling System                        | WRF v4.1.1 Prediction                        | 2016             | percent                |
| SFC_TMP.K.cmaq                         | Surface Air Temperature                               | CMAQ Modeling System                        | WRF v4.1.1 Prediction                        | 2016             | K                      |
| Population.people.5yracs               | Population by county                                  | Census/5 yr American Community Survey (ACS) | Variable S0101_C01_001E from ACS Table S0101 | 2012-2016        | People                 |
| O3.ppbV.cmaq                           | Ozone concentration                                   | CMAQ Modeling System                        | CMAQ v5.3.1 Prediction                       | 2016             | ppbV                   |
| NO2.ppbV.cmaq                          | NO <sub>2</sub> concentration                         | CMAQ Modeling System                        | CMAQ v5.3.1 Prediction                       | 2016             | ppbV                   |

\*County Health Rankings 2018 data developed as a collaboration between the Robert Wood Johnson Foundation and the University of Wisconsin Population Health Institute were obtained from <https://www.countyhealthrankings.org/explore-health-rankings/rankings-data-documentation>. Full documentation, including a Data Dictionary, is available at the link. Date of last access: 31 March 2020.

**Supplementary Table 4:** Correlation (Pearson r) between final PM<sub>2.5</sub> aggregates (columns) and species (rows) predicted by CMAQ for the contiguous US. Red indicates r > 0.8.

|                                 | TOT  | OA   | SO <sub>4</sub> | SEASPRAY | DUST  | NH <sub>4</sub> NO <sub>3</sub> | SOOT | POA  | SOA  | SOA <sub>BVOC</sub> | SOA <sub>AVOC</sub> | SOA <sub>ISOPRENE</sub> | SOA <sub>TERPENE</sub> |
|---------------------------------|------|------|-----------------|----------|-------|---------------------------------|------|------|------|---------------------|---------------------|-------------------------|------------------------|
| CL                              | 0.05 | 0.12 | 0.07            | 0.99     | -0.15 | -0.28                           | 0.15 | 0.10 | 0.12 | 0.16                | 0.01                | 0.07                    | 0.20                   |
| EC                              | 0.77 | 0.63 | 0.52            | 0.12     | 0.58  | 0.55                            | 0.99 | 0.78 | 0.52 | 0.30                | 0.74                | 0.37                    | 0.24                   |
| NA                              | 0.10 | 0.23 | 0.17            | 0.99     | -0.15 | -0.39                           | 0.12 | 0.08 | 0.24 | 0.32                | 0.05                | 0.23                    | 0.34                   |
| MG                              | 0.27 | 0.30 | 0.26            | 0.95     | 0.10  | -0.22                           | 0.32 | 0.19 | 0.30 | 0.31                | 0.19                | 0.26                    | 0.31                   |
| K                               | 0.83 | 0.72 | 0.59            | 0.22     | 0.66  | 0.44                            | 0.88 | 0.69 | 0.65 | 0.47                | 0.78                | 0.51                    | 0.41                   |
| CA                              | 0.68 | 0.36 | 0.56            | -0.03    | 0.95  | 0.52                            | 0.56 | 0.35 | 0.33 | 0.18                | 0.49                | 0.32                    | 0.10                   |
| NH <sub>4</sub>                 | 0.63 | 0.31 | 0.65            | -0.42    | 0.61  | 0.94                            | 0.50 | 0.41 | 0.25 | 0.00                | 0.59                | 0.23                    | -0.12                  |
| NO <sub>3</sub>                 | 0.52 | 0.15 | 0.37            | -0.29    | 0.58  | 0.99                            | 0.55 | 0.40 | 0.06 | -0.20               | 0.48                | -0.06                   | -0.25                  |
| OC                              | 0.88 | 1.00 | 0.63            | 0.18     | 0.43  | 0.21                            | 0.68 | 0.74 | 0.97 | 0.88                | 0.84                | 0.86                    | 0.83                   |
| OM                              | 0.88 | 1.00 | 0.67            | 0.19     | 0.43  | 0.21                            | 0.66 | 0.71 | 0.98 | 0.89                | 0.85                | 0.89                    | 0.83                   |
| OTHR                            | 0.83 | 0.56 | 0.67            | -0.06    | 0.97  | 0.57                            | 0.68 | 0.57 | 0.50 | 0.33                | 0.65                | 0.46                    | 0.24                   |
| FE                              | 0.65 | 0.27 | 0.57            | -0.18    | 0.94  | 0.70                            | 0.54 | 0.32 | 0.22 | 0.03                | 0.49                | 0.20                    | -0.06                  |
| SI                              | 0.68 | 0.32 | 0.58            | -0.15    | 0.94  | 0.67                            | 0.59 | 0.34 | 0.28 | 0.09                | 0.52                | 0.25                    | 0.00                   |
| TI                              | 0.63 | 0.29 | 0.54            | -0.19    | 0.83  | 0.68                            | 0.54 | 0.36 | 0.24 | 0.06                | 0.47                | 0.22                    | -0.02                  |
| MN                              | 0.65 | 0.28 | 0.57            | -0.18    | 0.91  | 0.67                            | 0.52 | 0.31 | 0.24 | 0.06                | 0.49                | 0.21                    | -0.02                  |
| AL                              | 0.57 | 0.19 | 0.55            | -0.25    | 0.91  | 0.66                            | 0.41 | 0.22 | 0.16 | -0.01               | 0.40                | 0.17                    | -0.10                  |
| UNSPCRS                         | 0.50 | 0.16 | 0.38            | -0.27    | 0.90  | 0.51                            | 0.36 | 0.20 | 0.14 | 0.01                | 0.31                | 0.15                    | -0.06                  |
| GLYSOA                          | 0.85 | 0.93 | 0.77            | 0.10     | 0.46  | 0.19                            | 0.52 | 0.54 | 0.95 | 0.87                | 0.81                | 0.97                    | 0.76                   |
| OLGB                            | 0.66 | 0.81 | 0.70            | 0.25     | 0.29  | -0.08                           | 0.31 | 0.37 | 0.85 | 0.88                | 0.57                | 0.97                    | 0.77                   |
| ISOP                            | 0.68 | 0.88 | 0.54            | 0.07     | 0.28  | -0.03                           | 0.38 | 0.46 | 0.90 | 0.90                | 0.66                | 0.92                    | 0.83                   |
| IEPOX                           | 0.62 | 0.71 | 0.80            | 0.27     | 0.27  | -0.02                           | 0.29 | 0.38 | 0.73 | 0.73                | 0.51                | 0.91                    | 0.59                   |
| SQT                             | 0.52 | 0.76 | 0.36            | 0.23     | 0.14  | -0.17                           | 0.21 | 0.25 | 0.82 | 0.93                | 0.41                | 0.75                    | 0.95                   |
| MTN                             | 0.65 | 0.90 | 0.45            | 0.26     | 0.21  | -0.13                           | 0.41 | 0.44 | 0.94 | 0.97                | 0.62                | 0.85                    | 0.95                   |
| MT                              | 0.43 | 0.73 | 0.22            | 0.30     | 0.02  | -0.28                           | 0.17 | 0.25 | 0.79 | 0.92                | 0.35                | 0.67                    | 0.97                   |
| SOA <sub>ISOPRENE</sub>         | 0.75 | 0.89 | 0.74            | 0.18     | 0.36  | 0.03                            | 0.41 | 0.47 | 0.92 | 0.90                | 0.69                | 1.00                    | 0.79                   |
| SOA <sub>TERPENE</sub>          | 0.55 | 0.83 | 0.35            | 0.28     | 0.12  | -0.21                           | 0.28 | 0.34 | 0.89 | 0.98                | 0.49                | 0.79                    | 1.00                   |
| TOT                             | 1.00 | 0.88 | 0.82            | 0.09     | 0.76  | 0.57                            | 0.81 | 0.74 | 0.83 | 0.65                | 0.90                | 0.75                    | 0.55                   |
| OA                              | 0.88 | 1.00 | 0.67            | 0.19     | 0.43  | 0.21                            | 0.66 | 0.71 | 0.98 | 0.89                | 0.85                | 0.89                    | 0.83                   |
| SO <sub>4</sub>                 | 0.82 | 0.67 | 1.00            | 0.14     | 0.61  | 0.47                            | 0.55 | 0.47 | 0.65 | 0.50                | 0.72                | 0.74                    | 0.35                   |
| SEASPRAY                        | 0.09 | 0.19 | 0.14            | 1.00     | -0.13 | -0.34                           | 0.14 | 0.10 | 0.20 | 0.26                | 0.04                | 0.18                    | 0.28                   |
| DUST                            | 0.76 | 0.43 | 0.61            | -0.13    | 1.00  | 0.61                            | 0.61 | 0.45 | 0.38 | 0.21                | 0.56                | 0.36                    | 0.12                   |
| NH <sub>4</sub> NO <sub>3</sub> | 0.57 | 0.21 | 0.47            | -0.34    | 0.61  | 1.00                            | 0.54 | 0.41 | 0.12 | -0.14               | 0.53                | 0.03                    | -0.21                  |
| SOOT                            | 0.81 | 0.66 | 0.55            | 0.14     | 0.61  | 0.54                            | 1.00 | 0.79 | 0.56 | 0.34                | 0.77                | 0.41                    | 0.28                   |
| POA                             | 0.74 | 0.71 | 0.47            | 0.10     | 0.45  | 0.41                            | 0.79 | 1.00 | 0.55 | 0.40                | 0.65                | 0.47                    | 0.34                   |
| SOA                             | 0.83 | 0.98 | 0.65            | 0.20     | 0.38  | 0.12                            | 0.56 | 0.55 | 1.00 | 0.94                | 0.82                | 0.92                    | 0.89                   |
| SOA <sub>BVOC</sub>             | 0.65 | 0.89 | 0.50            | 0.26     | 0.21  | -0.14                           | 0.34 | 0.40 | 0.94 | 1.00                | 0.58                | 0.90                    | 0.98                   |
| SOA <sub>AVOC</sub>             | 0.90 | 0.85 | 0.72            | 0.04     | 0.56  | 0.53                            | 0.77 | 0.65 | 0.82 | 0.58                | 1.00                | 0.69                    | 0.49                   |

**Supplementary Table 5:** Multiple regression model results for SOA and PM<sub>2.5</sub> (full results available in statmodels.pm25models.cYYYYMMDD.csv). Results include regressed coefficients for 1  $\mu\text{g}^{-1} \text{m}^3$  of pollutant ( $\beta_{1\mu\text{g}}$ ), standard error (SE), p-value, population-weighted concentration (Conc.), IQR of pollutant or pollutant residual, presence of O<sub>3</sub> and NO<sub>2</sub> in model, adjustment for PM<sub>2.5</sub>, region, type of model, and regressed coefficient for IQR normalized concentration ( $\beta_{\text{IQR}}$ ).

| Pollutant    | $\beta_{1\mu\text{g}}$                       | $\beta_{1\mu\text{g}}$ 95% CI |       | SE   | p-val. | Conc. | IQR  | O <sub>3</sub> NO <sub>2</sub> | PM-adj | Region      | Model             | $\beta_{\text{IQR}}$ | $\beta_{\text{IQR}}$ 95% CI |                  |
|--------------|----------------------------------------------|-------------------------------|-------|------|--------|-------|------|--------------------------------|--------|-------------|-------------------|----------------------|-----------------------------|------------------|
|              | deaths $10^{-5} \mu\text{g}^{-1} \text{m}^3$ |                               |       |      |        |       |      |                                |        |             |                   | $\mu\text{g m}^{-3}$ | $\mu\text{g m}^{-3}$        | deaths $10^{-5}$ |
| PM25 SOA     | 5.4                                          | 2.9                           | 7.9   | 1.3  | 3E-05  | 2.35  | 1.44 | FALSE                          | FALSE  | CONUS       | SP PM25           | 7.8                  | 4.2                         | 11.4             |
| PM25 SOA     | 5.4                                          | 1.9                           | 9.0   | 1.8  | 3E-03  | 2.35  | 1.44 | FALSE                          | TRUE   | CONUS       | SP-adj PM25       | 7.8                  | 2.7                         | 12.9             |
| PM25 SOA     | 1.7                                          | -1.4                          | 4.7   | 1.6  | 3E-01  | 2.35  | 0.70 | FALSE                          | FALSE  | CONUS       | R PM25            | 1.2                  | -1.0                        | 3.3              |
| PM25 SOA     | 8.9                                          | 6.0                           | 11.9  | 1.5  | 4E-09  | 2.35  | 1.44 | FALSE                          | FALSE  | CONUS       | MP OA             | 12.8                 | 8.6                         | 17.1             |
| PM25 SOAAVOC | 6.8                                          | 2.9                           | 10.7  | 2.0  | 6E-04  | 1.37  | 0.54 | FALSE                          | FALSE  | CONUS       | SP PM25           | 3.7                  | 1.6                         | 5.8              |
| PM25 SOAAVOC | 5.7                                          | -0.5                          | 11.8  | 3.1  | 7E-02  | 1.37  | 0.54 | FALSE                          | TRUE   | CONUS       | SP-adj PM25       | 3.1                  | -0.3                        | 6.4              |
| PM25 SOAAVOC | 5.5                                          | -0.6                          | 11.7  | 3.1  | 8E-02  | 1.37  | 0.19 | FALSE                          | FALSE  | CONUS       | R PM25            | 1.1                  | -0.1                        | 2.2              |
| PM25 SOAAVOC | 6.2                                          | 0.5                           | 11.8  | 2.9  | 3E-02  | 1.37  | 0.54 | FALSE                          | FALSE  | CONUS       | MP SOA            | 3.4                  | 0.3                         | 6.4              |
| PM25 SOABVOC | 6.9                                          | 2.7                           | 11.0  | 2.1  | 1E-03  | 0.98  | 0.91 | FALSE                          | FALSE  | CONUS       | SP PM25           | 6.2                  | 2.5                         | 10.0             |
| PM25 SOABVOC | 5.4                                          | 1.0                           | 9.8   | 2.2  | 2E-02  | 0.98  | 0.91 | FALSE                          | TRUE   | CONUS       | SP-adj PM25       | 4.9                  | 1.0                         | 8.9              |
| PM25 SOABVOC | 0.4                                          | -3.1                          | 4.0   | 1.8  | 8E-01  | 0.98  | 0.61 | FALSE                          | FALSE  | CONUS       | R PM25            | 0.3                  | -1.9                        | 2.4              |
| PM25 SOABVOC | 11.1                                         | 6.3                           | 15.8  | 2.4  | 5E-06  | 0.98  | 0.91 | FALSE                          | FALSE  | CONUS       | MP SOA            | 10.1                 | 5.8                         | 14.4             |
| PM25 TOT     | 1.4                                          | 0.5                           | 2.3   | 0.5  | 3E-03  | 7.42  | 2.68 | FALSE                          | FALSE  | CONUS       | SP PM25           | 3.7                  | 1.2                         | 6.2              |
| PM25 TOT     | 2.4                                          | 0.9                           | 3.8   | 0.7  | 1E-03  | 7.42  | 2.68 | TRUE                           | FALSE  | CONUS       | SP PM25 O3,NO2    | 6.3                  | 2.4                         | 10.2             |
| PM25 SOA     | 24.9                                         | 15.2                          | 34.7  | 5.0  | 7E-07  | 3.05  | 0.82 | FALSE                          | FALSE  | SoutheastUS | SP PM25 SEast     | 20.5                 | 12.5                        | 28.5             |
| PM25 SOA     | 21.5                                         | 9.1                           | 33.9  | 6.3  | 7E-04  | 3.05  | 0.82 | FALSE                          | TRUE   | SoutheastUS | SP-adj PM25 SEast | 17.7                 | 7.5                         | 27.9             |
| PM25 SOA     | 27.1                                         | 16.1                          | 38.2  | 5.6  | 2E-06  | 3.05  | 0.82 | FALSE                          | FALSE  | SoutheastUS | MP OA SEast       | 22.3                 | 13.2                        | 31.4             |
| PM25 SOA     | 10.8                                         | -1.0                          | 22.7  | 6.0  | 7E-02  | 3.05  | 0.52 | FALSE                          | FALSE  | SoutheastUS | R PM25 SEast      | 5.6                  | -0.5                        | 11.7             |
| PM25 SOAAVOC | -8.0                                         | -38.3                         | 22.3  | 15.4 | 6E-01  | 1.44  | 0.21 | FALSE                          | FALSE  | SoutheastUS | SP PM25 SEast     | -1.7                 | -7.9                        | 4.6              |
| PM25 SOAAVOC | -69.1                                        | -106.6                        | -31.6 | 19.1 | 3E-04  | 1.44  | 0.21 | FALSE                          | TRUE   | SoutheastUS | SP-adj PM25 SEast | -14.3                | -22.1                       | -6.5             |
| PM25 SOAAVOC | -53.7                                        | -100.7                        | -6.7  | 23.9 | 3E-02  | 1.44  | 0.21 | FALSE                          | FALSE  | SoutheastUS | MP SOA SEast      | -11.1                | -20.9                       | -1.4             |
| PM25 SOAAVOC | -80.0                                        | -117.2                        | -42.9 | 18.9 | 3E-05  | 1.44  | 0.13 | FALSE                          | FALSE  | SoutheastUS | R PM25 SEast      | -10.5                | -15.4                       | -5.6             |
| PM25 SOABVOC | 28.1                                         | 18.0                          | 38.2  | 5.2  | 7E-08  | 1.61  | 0.72 | FALSE                          | FALSE  | SoutheastUS | SP PM25 SEast     | 20.2                 | 12.9                        | 27.5             |
| PM25 SOABVOC | 24.1                                         | 12.8                          | 35.4  | 5.7  | 3E-05  | 1.61  | 0.72 | FALSE                          | TRUE   | SoutheastUS | SP-adj PM25 SEast | 17.3                 | 9.2                         | 25.4             |
| PM25 SOABVOC | 34.4                                         | 22.7                          | 46.0  | 5.9  | 1E-08  | 1.61  | 0.72 | FALSE                          | FALSE  | SoutheastUS | MP SOA SEast      | 24.7                 | 16.3                        | 33.1             |
| PM25 SOABVOC | 16.4                                         | 5.4                           | 27.5  | 5.6  | 4E-03  | 1.61  | 0.50 | FALSE                          | FALSE  | SoutheastUS | R PM25 SEast      | 8.2                  | 2.7                         | 13.7             |
| PM25 TOT     | 9.1                                          | 4.4                           | 13.8  | 2.4  | 2E-04  | 7.88  | 1.14 | FALSE                          | FALSE  | SoutheastUS | SP PM25 SEast     | 10.4                 | 5.0                         | 15.8             |

**Supplementary Table 6:** Results of single and multi-pollutant multiple regression models for inorganic species in Figure 3. Models are for the contiguous U.S. unless otherwise noted as the Southeast (SEast).

| <b>Pollutant</b> | <b>Model</b>  | <b><math>\beta_{IQR}</math></b> | <b><math>\beta_{IQR}</math> 95% CI<br/>Lower Bound</b> | <b><math>\beta_{IQR}</math> 95% CI<br/>Upper Bound</b> |
|------------------|---------------|---------------------------------|--------------------------------------------------------|--------------------------------------------------------|
|                  |               | deaths $10^{-5}$                | deaths $10^{-5}$                                       | deaths $10^{-5}$                                       |
| PM25_SO4         | SP PM25       | 4.5                             | 1.8                                                    | 7.2                                                    |
| PM25_SOA         | SP PM25       | 7.8                             | 4.2                                                    | 11.4                                                   |
| PM25_SEASPRAY    | SP PM25       | 0.7                             | -0.8                                                   | 2.1                                                    |
| PM25_DUST        | SP PM25       | 2.9                             | 1.2                                                    | 4.5                                                    |
| PM25_NH4NO3      | SP PM25       | 3.3                             | 1.4                                                    | 5.1                                                    |
| PM25_SOOT        | SP PM25       | -2.3                            | -3.3                                                   | -1.2                                                   |
| PM25_SEASPRAY    | MP            | 2.7                             | 1.1                                                    | 4.3                                                    |
| PM25_SOOT        | MP            | -8.1                            | -9.7                                                   | -6.5                                                   |
| PM25_DUST        | MP            | 5.1                             | 2.6                                                    | 7.6                                                    |
| PM25_NH4NO3      | MP            | 2.6                             | -0.3                                                   | 5.5                                                    |
| PM25_SO4         | MP            | 3.9                             | -0.3                                                   | 8.1                                                    |
| PM25_SEASPRAY    | MP OA         | 2.7                             | 1.1                                                    | 4.3                                                    |
| PM25_SOOT        | MP OA         | -6.9                            | -9.3                                                   | -4.6                                                   |
| PM25_DUST        | MP OA         | 4.8                             | 2.3                                                    | 7.3                                                    |
| PM25_NH4NO3      | MP OA         | 2.6                             | -0.3                                                   | 5.5                                                    |
| PM25_SO4         | MP OA         | 4.0                             | -0.3                                                   | 8.2                                                    |
| PM25_SOA         | MP OA         | 12.8                            | 8.6                                                    | 17.1                                                   |
| PM25_SO4         | SP PM25 SEast | 2.4                             | -3.4                                                   | 8.3                                                    |
| PM25_SOA         | SP PM25 SEast | 20.5                            | 12.5                                                   | 28.5                                                   |
| PM25_SEASPRAY    | SP PM25 SEast | -5.1                            | -14.0                                                  | 3.9                                                    |
| PM25_DUST        | SP PM25 SEast | 4.9                             | 0.2                                                    | 9.7                                                    |
| PM25_NH4NO3      | SP PM25 SEast | 8.0                             | -1.1                                                   | 17.0                                                   |
| PM25_SOOT        | SP PM25 SEast | 0.5                             | -3.3                                                   | 4.4                                                    |
| PM25_SEASPRAY    | MP SEast      | 7.0                             | -3.3                                                   | 17.4                                                   |
| PM25_SOOT        | MP SEast      | -6.9                            | -12.5                                                  | -1.4                                                   |
| PM25_DUST        | MP SEast      | 4.6                             | -2.5                                                   | 11.7                                                   |
| PM25_NH4NO3      | MP SEast      | 10.7                            | 0.6                                                    | 20.8                                                   |
| PM25_SO4         | MP SEast      | -0.6                            | -10.1                                                  | 8.9                                                    |
| PM25_SEASPRAY    | MP OA SEast   | 7.6                             | -2.8                                                   | 17.9                                                   |
| PM25_SOOT        | MP OA SEast   | -4.2                            | -10.6                                                  | 2.3                                                    |
| PM25_DUST        | MP OA SEast   | 4.9                             | -2.2                                                   | 12.0                                                   |
| PM25_NH4NO3      | MP OA SEast   | 9.1                             | -1.1                                                   | 19.4                                                   |
| PM25_SO4         | MP OA SEast   | -2.0                            | -11.6                                                  | 7.7                                                    |
| PM25_SOA         | MP OA SEast   | 22.3                            | 13.2                                                   | 31.4                                                   |

**Supplementary Table 7:** Results of single pollutant multiple regression models for OC (modeled by CMAQ and observed at AQS sites) at counties with AQS sites only. All OC in  $\mu\text{gC m}^{-3}$ . Models are for the contiguous U.S. and do not include exposure to  $\text{O}_3$  or  $\text{NO}_2$  or  $\text{PM}_{2.5}$  adjustment. Variables are the same as those in Supplementary Table 5.

| Pollutant       | $\beta_{1\mu\text{g}}$                          | $\beta_{1\mu\text{g}}$ 95% CI |     | SE  | p-val. | Conc.                 | IQR                   | Model | $\beta_{\text{IQR}}$ | $\beta_{\text{IQR}}$ 95% CI |     |
|-----------------|-------------------------------------------------|-------------------------------|-----|-----|--------|-----------------------|-----------------------|-------|----------------------|-----------------------------|-----|
|                 | deaths $10^{-5}$ $\mu\text{gC}^{-1} \text{m}^3$ |                               |     |     |        | $\mu\text{gC m}^{-3}$ | $\mu\text{gC m}^{-3}$ |       | deaths $10^{-5}$     |                             |     |
| PM25_OCmodel    | -1.3                                            | -12                           | 9.3 | 5.4 | 0.81   | 1.7                   | 1.2                   | SP    | -1.6                 | -14                         | 11  |
| PM25_OCobserved | 4.1                                             | 1.1                           | 7.0 | 1.5 | 0.007  | 2.0                   | 1.2                   | SP    | 4.9                  | 1.3                         | 8.4 |

**Supplementary Table 8:** CMAQ v5.3.1 simulation configuration (as in the work of Appel, et al. <sup>1</sup> CMAQ531\_WRF411\_M3Dry\_BiDi).

| Option                          | Configuration                                                     |
|---------------------------------|-------------------------------------------------------------------|
| Chemical mechanism              | cb6r3                                                             |
| Aerosol module                  | aero7                                                             |
| POA volatility                  | semivolatile                                                      |
| Anthropogenic SOA (pcSOA)       | pcSOA included from anthropogenic sources other than wood burning |
| Meteorology                     | WRF v4.1.1 processed with MCIP v5.0                               |
| Deposition                      | M3Dry                                                             |
| Boundary conditions             | Hemispheric CMAQ v5.3.1 with CB6R3M AE7 KMTBR and WRF3.8          |
| Bi-directional ammonia emission | Yes                                                               |
| Emission platform               | 2016v1 (fh) based on 2014 NEI                                     |

**Supplementary Table 9:** Comparison of AQS-observed and CMAQ model-predicted PM<sub>2.5</sub> and its components across the US for 2016. Green shading indicates the metric meets the goal level for that component and/or concentration level. Blue shading indicates the metric meets the criteria performance metric for that component. NMB goal and criteria levels are component specific as specified in the work of Emery, et al. <sup>2</sup> NMB criteria are not available for dust or sea spray components. The MFB and MFE goals are a function of concentration as specified in the work of Boylan and Russell <sup>3</sup>.

| Component                       | Median Observed [ $\mu\text{g m}^{-3}$ ] | Median Predicted [ $\mu\text{g m}^{-3}$ ] | IQR Observed [ $\mu\text{g m}^{-3}$ ] | IQR Predicted [ $\mu\text{g m}^{-3}$ ] | NMB <sup>e</sup> | MFB <sup>f</sup> | MFE <sup>g</sup> |
|---------------------------------|------------------------------------------|-------------------------------------------|---------------------------------------|----------------------------------------|------------------|------------------|------------------|
| PM <sub>2.5</sub>               | 6.63                                     | 6.64                                      | 5.45                                  | 5.90                                   | 2%               | 2%               | 42%              |
| OC <sup>a</sup>                 | 0.93                                     | 1.01                                      | 1.21                                  | 1.48                                   | 7%               | 10%              | 50%              |
| Dust <sup>b</sup>               | 0.19                                     | 0.27                                      | 0.28                                  | 0.39                                   | 22%              | 32%              | 77%              |
| SO <sub>4</sub>                 | 0.59                                     | 0.73                                      | 0.75                                  | 0.62                                   | 8%               | 23%              | 46%              |
| NH <sub>4</sub> NO <sub>3</sub> | 0.47                                     | 0.33                                      | 0.73                                  | 0.58                                   | -20%             | -21%             | 59%              |
| Soot <sup>c</sup>               | 0.21                                     | 0.21                                      | 0.38                                  | 0.42                                   | 8%               | 10%              | 51%              |
| Sea spray <sup>d</sup>          | 0.05                                     | 0.08                                      | 0.11                                  | 0.11                                   | -5%              | 48%              | 82%              |

<sup>a</sup>Units of OC are  $\mu\text{gC m}^{-3}$

<sup>b</sup>Dust is evaluated using the sum of Ca + Fe + Si + Ti + Mn + Al

<sup>c</sup>Soot is evaluated as EC + K

<sup>d</sup>Sea spray is evaluated as Na + Cl + Mg

<sup>e</sup>Normalized mean bias (NMB):  $\frac{\sum_{i=1}^N M_i - O_i}{\sum_{i=1}^N O_i} \times 100\%$ , where  $M_i$  is the model prediction and  $O_i$  is the observation and  $N$  is the total number of daily observations.

<sup>f</sup>Mean fractional bias (MFB):  $\frac{2}{N} \sum_{i=1}^N \frac{M_i - O_i}{M_i + O_i} \times 100\%$

<sup>g</sup>Mean fractional error (MFE):  $\frac{2}{N} \sum_{i=1}^N \frac{|M_i - O_i|}{M_i + O_i} \times 100\%$

**Supplementary Table 10:** CMAQ organic aerosol evaluation with non-routine and/or source resolved measurements for the contiguous US. Italics indicate systems and algorithms that motivated updates to CMAQ and were replaced or modified in later model versions. See table footnote for abbreviations.

| <b>OA System</b>                                      | <b>CMAQ version</b>                                 | <b>Model Algorithm Basis</b>                                                                                | <b>Evaluation Study</b>                      | <b>Measurements</b>                                                                                                                        | <b>Evaluation Results</b>                                                                                                                                                                                     |
|-------------------------------------------------------|-----------------------------------------------------|-------------------------------------------------------------------------------------------------------------|----------------------------------------------|--------------------------------------------------------------------------------------------------------------------------------------------|---------------------------------------------------------------------------------------------------------------------------------------------------------------------------------------------------------------|
| <i>Isoprene SOA</i>                                   | <i>v5.0.1 with Isoprene SOA as in v5.1</i>          | <i>Pye, et al. <sup>4</sup></i>                                                                             | <i>Pye, et al. <sup>4</sup></i>              | <i>Speciated isoprene SOA (2-methyltetrols and 2-methylglyceric acid) from filter-based analysis across the US</i>                         | <i>New algorithms improved CMAQ predictions of isoprene SOA tracers; Sensitivity to rate constants and Henry's law parameters identified</i>                                                                  |
| <i>Isoprene SOA</i>                                   | <i>v5.0.1 with Isoprene SOA as in v5.1</i>          | <i>Pye, et al. <sup>4</sup></i>                                                                             | <i>Karambelas, et al. <sup>5</sup></i>       | <i>IEPOX OA PMF Factor from ACSM operated at Jefferson Street site in Atlanta during summer 2011</i>                                       | <i>Strong temporal correspondence between CMAQ-predicted and PMF-observed IEPOX OA; Model IEPOX OA magnitude low</i>                                                                                          |
| <i>Isoprene SOA</i>                                   | <i>v5.1 in box model</i>                            | <i>box model based on Pye, et al. <sup>4</sup> with updates as in Budisulistiorini, et al. <sup>6</sup></i> | <i>Budisulistiorini, et al. <sup>6</sup></i> | <i>Isoprene-derived organosulfates and 2-methyltetrols at SOAS-LRK</i>                                                                     | <i>Correlation (<math>r^2</math>) between box model-predicted and observed tracers about 0.6.</i>                                                                                                             |
| Isoprene SOA                                          | v5.2                                                | Pye, et al. <sup>4</sup> framework with Pye, et al. <sup>7</sup> parameter updates                          | Pye, et al. <sup>7</sup>                     | Isoprene-OA or similar AMS/ACSM factor at SOAS-CTR and SOAS-LRK; 2-methyltetrols at SOAS-CTR                                               | Isoprene-OA vs. sulfate trend (slope and correlation) similar in model and observations; Isoprene-OA NMB 10% at CTR and -39% at LRK; 2-methyltetrol NMB -22% at CTR                                           |
| Multiple biogenic systems                             | v5.1 with SOA+POA updates as in v5.2                | Pye, et al. <sup>8</sup> ; Pye, et al. <sup>7</sup> ; Murphy, et al. <sup>9</sup>                           | Liu, et al. <sup>10</sup>                    | AMS, ACSM, and FTIR PMF factors including multiple types of biogenic SOA at SOAS-CTR and SOAS-LRK                                          | Qualitative consistency between CMAQ and observations in terms of regional abundance of isoprene vs monoterpene SOA and spatial variability including NO <sub>x</sub> -driven enhancements of SOA at SOAS-CTR |
| <i>Monoterpene (MT) SOA</i>                           | <i>v5.1</i>                                         | <i>Carlton, et al. <sup>11</sup></i>                                                                        | <i>Zhang, et al. <sup>12</sup></i>           | <i>~334 molecular formulas from GC + additional from FIGAERO-CIMS attributed to monoterpene oxidation at SOAS-CTR (approx. 55% of OOA)</i> | <i>Monoterpene SOA significantly underestimated in CMAQ v5.1</i>                                                                                                                                              |
| <i>LO-OOA (later associated with monoterpene SOA)</i> | <i>v5.1 with traditional SOA updates as in v5.2</i> | <i>Pye, et al. <sup>7</sup></i>                                                                             | <i>Pye, et al. <sup>7</sup></i>              | <i>LO-OOA and OM/OC from SOAS-CTR<sup>2</sup></i>                                                                                          | <i>LO-OOA underestimated in CMAQ (by ~50%); OM/OC reasonable</i>                                                                                                                                              |

| OA System                                                  | CMAQ version                       | Model Algorithm Basis                                                                                    | Evaluation Study            | Measurements                                                                                                                          | Evaluation Results                                                                                                                                                                                                                          |
|------------------------------------------------------------|------------------------------------|----------------------------------------------------------------------------------------------------------|-----------------------------|---------------------------------------------------------------------------------------------------------------------------------------|---------------------------------------------------------------------------------------------------------------------------------------------------------------------------------------------------------------------------------------------|
| MT SOA                                                     | v5.2                               | Carlton, et al. <sup>11</sup>                                                                            | Pye, et al. <sup>13</sup>   | <i>a</i> -pinene low-NO <sub>x</sub> laboratory experiment from SOAFFEE                                                               | CMAQ v5.2 predicted SOA yield (7%) much lower than observed (12%) in the experiment.                                                                                                                                                        |
| Monoterpene organic nitrate-derived SOA (subset of MT SOA) | v5.1-beta                          | Pye, et al. <sup>8</sup>                                                                                 | Pye, et al. <sup>8</sup>    | SOAS CTR LO-OOA; AMS particulate organic nitrate (pON)                                                                                | 60% of LO-OOA captured by organic nitrate SOA pathway; model-predicted pON abundance within observation uncertainty                                                                                                                         |
| MT SOA (and others)                                        | v5.3                               | Pye, et al. <sup>8</sup> ; Xu, et al. <sup>14</sup> ; semivolatile POA as in Murphy, et al. <sup>9</sup> | Lee, et al. <sup>15</sup>   | FIGAERO-CIMS molecular formulas from SOAS-CTR attributed to precursor system using SOAFFEE laboratory data                            | Both observations (year 2013) and model predictions (year 2016) qualitatively consistent in terms of monoterpene SOA dominance (~60% of total OA); limited isoprene SOA and other SOA sources similar in observations and model predictions |
| MT SOA                                                     | v5.2 updated with MTSOA as in v5.3 | Pye, et al. <sup>8</sup> ; Xu, et al. <sup>14</sup>                                                      | Xu, et al. <sup>14</sup>    | AMS+ACSM LO-OOA as a surrogate for monoterpene and sesquiterpene SOA; observations around the southeast US at different times of year | Updated CMAQ SOA (as in v5.3) consistent in terms of magnitude and diurnal variation with MT SOA as indicated by LO-OOA                                                                                                                     |
| Anthropogenic SOA and semivolatile POA                     | v5.2                               | Murphy, et al. <sup>9</sup>                                                                              | Murphy, et al. <sup>9</sup> | CalNex, CARES, and SOAS-CTR (as well as IMPROVE, CSN, and SEARCH network data) including AMS PMF factors                              | CMAQ updated with semivolatile POA+empirical anthropogenic SOA (as in v5.2-5.3) showed improved total OA mass in terms of correlation and bias; HOA, OOA, ratio of HOA:OOA and diurnal variation in OA improved significantly               |
| Anthropogenic SOA                                          | v5.3                               | Murphy, et al. <sup>9</sup>                                                                              |                             | CalNex Pasadena AMS OOA (normalization and/or background corrections applied)                                                         | Anthropogenic SOA implementation in CMAQ represents both combustion and non-combustion (e.g. volatile chemical product) SOA reflecting current state-of-science on anthropogenic SOA sources                                                |

#### Abbreviations

ACSM: Aerosol Chemical Speciation Monitor

AMS: Aerosol Mass Spectrometer, more specifically the High-Resolution Time-of-Flight Aerosol Mass Spectrometer (HR-ToF-AMS)

CalNex: California Research at the Nexus of Air Quality and Climate Change field campaign with supersite in Pasadena and Bakersfield, California, USA during May-June 2010



CARES: Carbonaceous Aerosols and Radiative Effects Study field campaign in northern California, June 2010  
FIGAERO-CIMS: Filter Inlet for Gases and Aerosols on Chemical Ionization Spectrometer  
FTIR: Fourier-transform infrared spectroscopy  
HOA: Hydrocarbon-like organic aerosol  
IEPOX-OA: SOA from isoprene epoxydiols  
LV-OOA: Low Volatility OOA  
LO-OOA: Less-Oxidized OOA  
NMB: Normalized mean bias  
OOA: Oxygenated organic aerosol, usually estimated via PMF  
PMF: Positive matrix factorization  
SOAFFEE: Secondary Organic Aerosol from Forest Emissions Experiment  
SOAS: Southern Oxidant and Aerosol Study field campaign in the southeastern U.S. during June 2013  
SOAS-CTR: Centreville, Alabama, USA site during SOAS 2013  
SOAS-LRK: Look Rock, Tennessee, USA site during SOAS 2013  
SV-OOA: Semi-Volatile OOA

**Supplementary Figure 1:** 2016 annual-average county-level concentration of aerosol species predicted by CMAQv5.3.1. Dust, soot, and POA color bar scales are capped at the 99<sup>th</sup> percentile of predicted values.

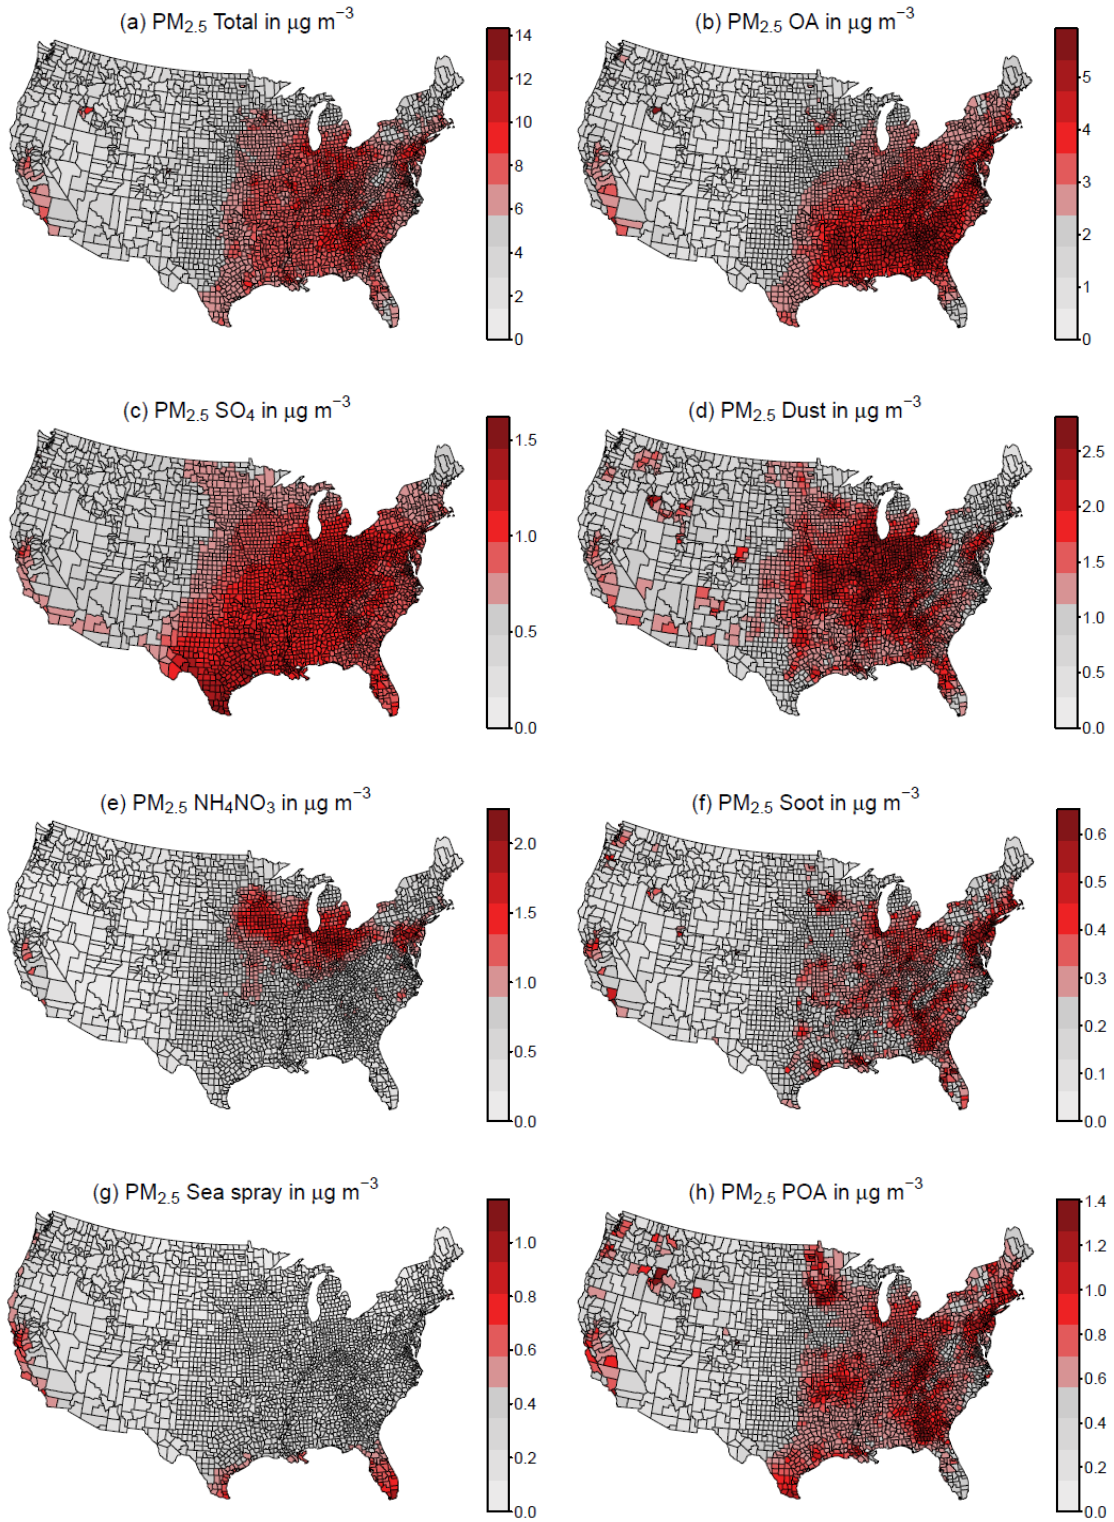

Supplementary Figure 1: continued

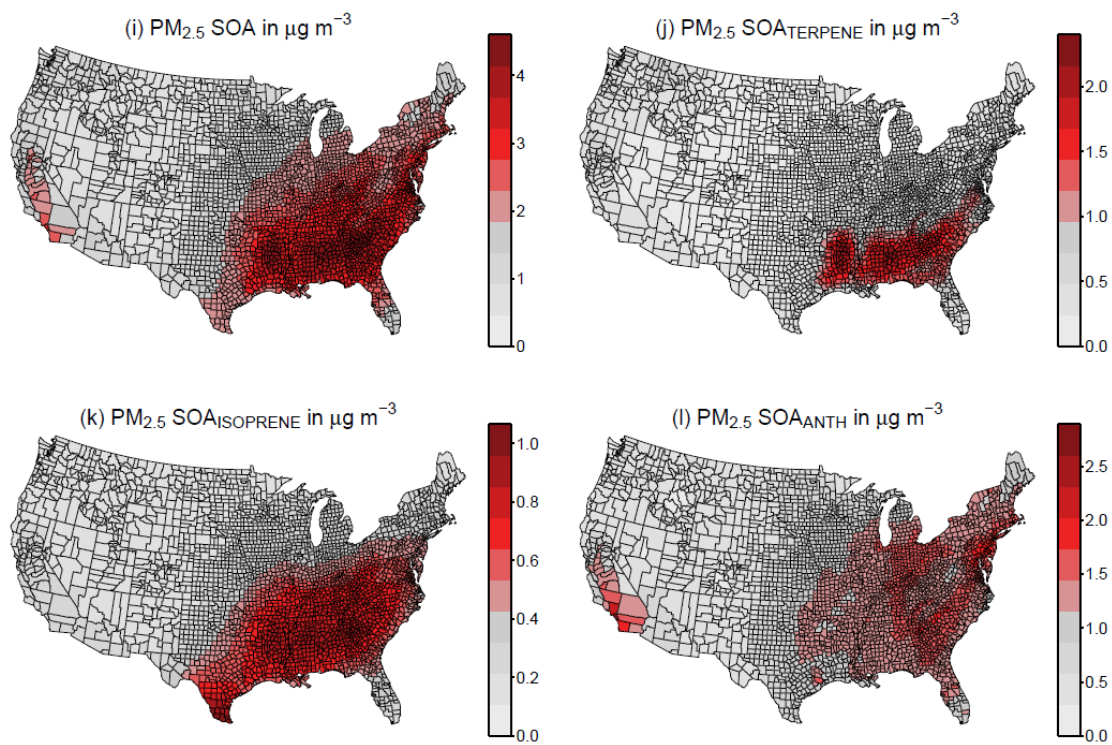

**Supplementary Figure 2:** Primary statistical analyses and associated sensitivity tests.

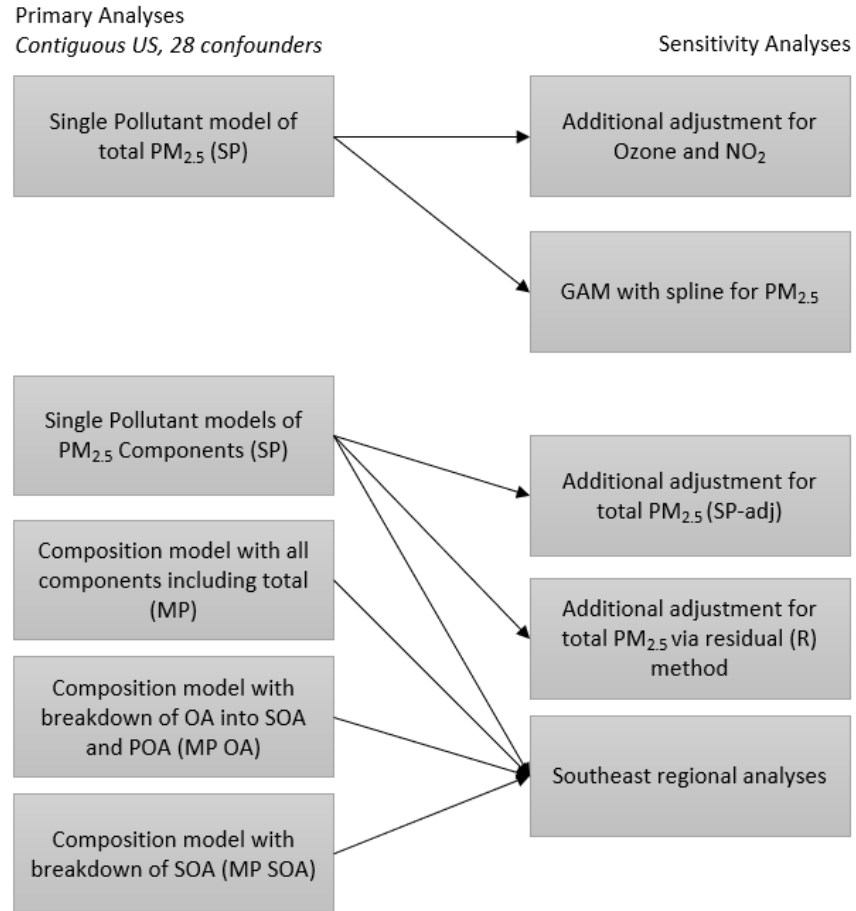

**Supplementary Figure 3:** Relationship between outcome (cardiorespiratory death rate) and PM<sub>2.5</sub> (a) total (PM25\_TOT) and (b) SOA (PM25\_SOA) concentration determined via thin plate spline in GAM framework. The basis dimension on the pollutant spline is set to 5 (k parameter in mgcv spline) in each case. Standard confounders are included. Shading represents two standard error bounds around the fit. PM<sub>2.5</sub> concentrations are shown on the horizontal axis in black vertical lines. Panel (a) for total PM<sub>2.5</sub> is limited to concentrations between the 5<sup>th</sup> and 95<sup>th</sup> percentile (2.9 and 9.0  $\mu\text{g m}^{-3}$ ) of the distribution.

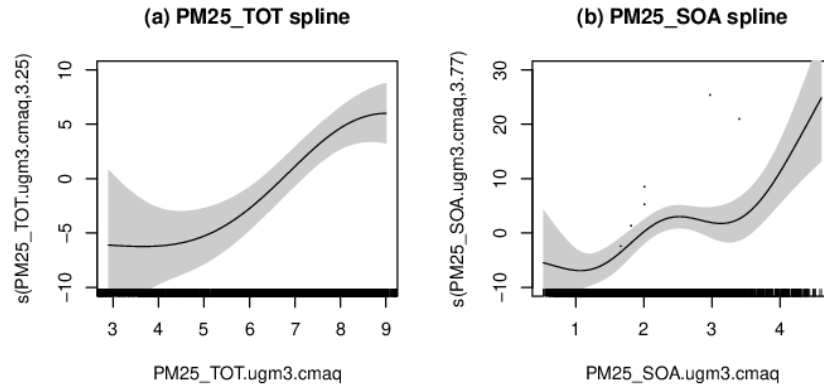

**Supplementary Figure 4:** Regressed coefficients (species normalized to IQR of pollutant or residual, open symbol) for the contiguous US (n=2,708) and southeastern (SE) US (n=646) using the 28 default confounders in (a, c) single pollutant adjusted for total PM<sub>2.5</sub> (SP-adj) and (b, d) residual (R) forms of multiple regression. Coefficients are ranked by the magnitude of the regressed coefficient. Whiskers span the 95% confidence interval.

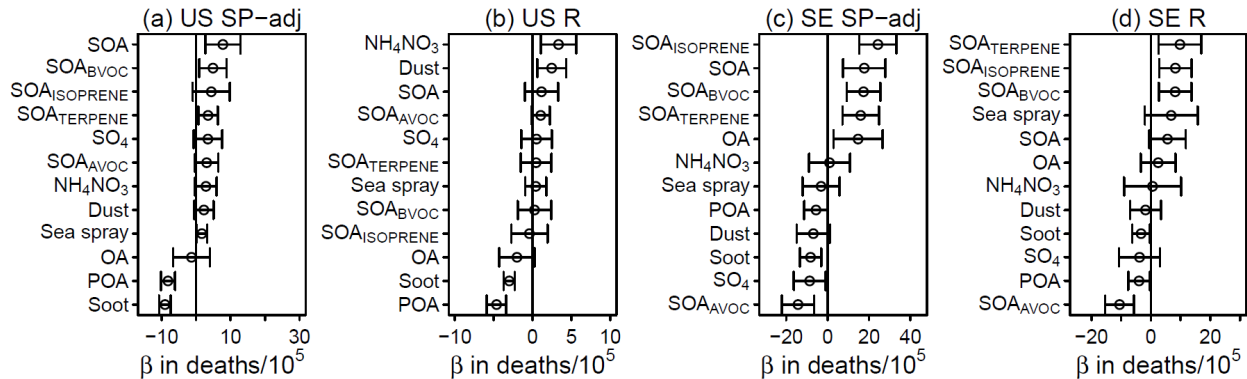

**Supplementary Figure 5:** Association of PM<sub>2.5</sub> SOA subcomponents with death rates across the contiguous U.S. (n=2,708) in black and southeastern (SE) U.S. (n=646) in red (open symbol) determined via regressed coefficients ( $\beta$ ) from multiple linear regression and their 95% confidence intervals (whiskers). Model forms are single pollutant (SP, circles) and multipollutant for the entire PM<sub>2.5</sub> composition with refinement of SOA subcomponents into SOA<sub>ISOPRENE</sub>, SOA<sub>TERPENE</sub>, and SOA<sub>AVOC</sub> (MP, triangles; See Supplementary Note). Regressed coefficients correspond to IQR-normalized species concentrations in units of deaths per 100,000 in population.

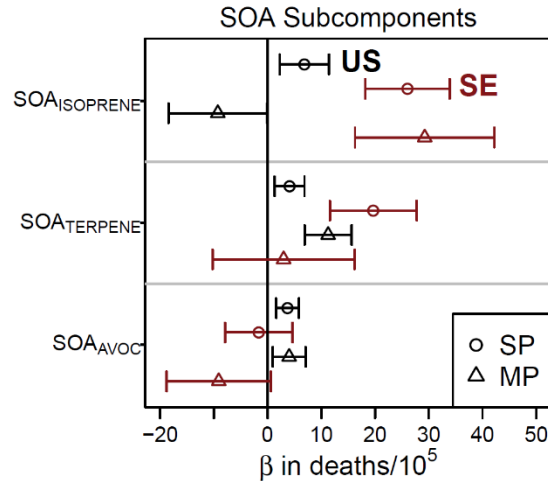

**Supplementary Figure 6:** AQS-observed and CMAQ-modeled PM<sub>2.5</sub> and its major components across the US for 2016. Here, dust is evaluated as Ca + Fe + Si + Ti + Mn + Al. Boxplots indicate the 2.5 to 97.5 percentiles (whiskers), interquartile range (shaded box), and median (horizontal line). The number of data points by species are: Total PM<sub>2.5</sub> 400,319; OC 28,422; Dust 22,129; SO<sub>4</sub> 29,976; NH<sub>4</sub>NO<sub>3</sub> 29,726; Soot 27,311, Sea Spray 21,030.

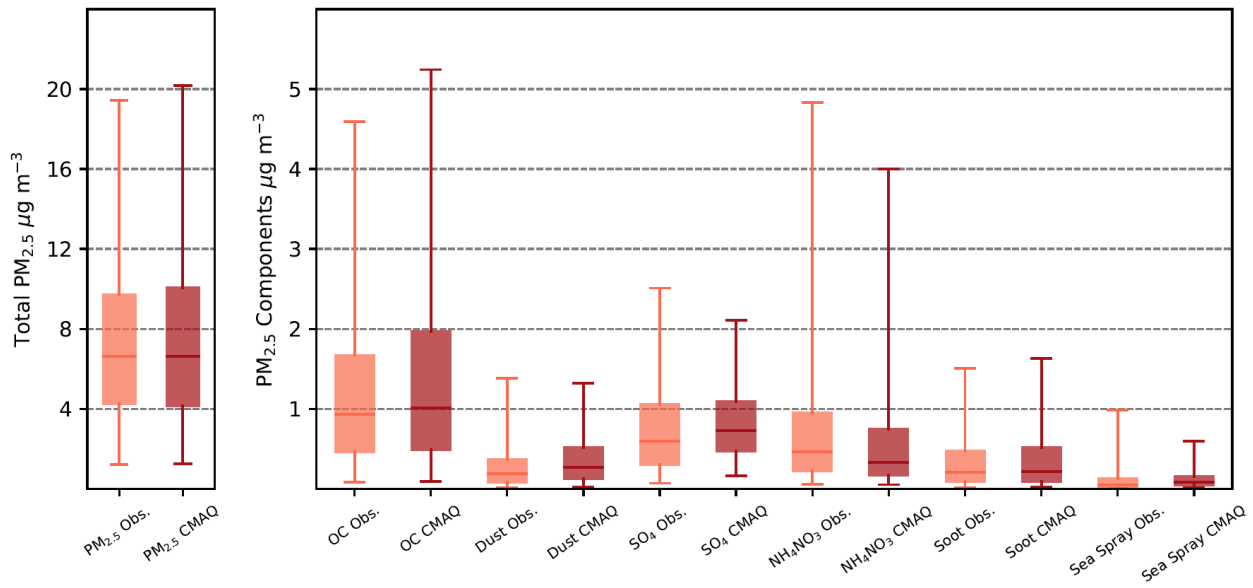

## References

- 1 Appel, K. W. *et al.* The Community Multiscale Air Quality (CMAQ) model versions 5.3 and 5.3.1: system updates and evaluation. *Geosci. Model Dev.* **14**, 2867-2897, doi:10.5194/gmd-14-2867-2021 (2021).
- 2 Emery, C. *et al.* Recommendations on statistics and benchmarks to assess photochemical model performance. *J. Air Waste Manage. Assoc.* **67**, 582-598, doi:10.1080/10962247.2016.1265027 (2017).
- 3 Boylan, J. W. & Russell, A. G. PM and light extinction model performance metrics, goals, and criteria for three-dimensional air quality models. *Atmos. Environ.* **40**, 4946-4959, doi:10.1016/j.atmosenv.2005.09.087 (2006).
- 4 Pye, H. O. T. *et al.* Epoxide pathways improve model predictions of isoprene markers and reveal key role of acidity in aerosol formation. *Environ. Sci. Technol.* **47**, 11056-11064, doi:10.1021/es402106h (2013).
- 5 Karambelas, A., Pye, H. O. T., Budisulistiorini, S. H., Surratt, J. D. & Pinder, R. W. Contribution of isoprene epoxydiol to urban organic aerosol: Evidence from modeling and measurements. *Environ. Sci. Tech. Lett.* **1**, 278-283, doi:10.1021/ez5001353 (2014).
- 6 Budisulistiorini, S. H. *et al.* Simulating aqueous-phase isoprene-epoxydiol (IEPOX) secondary organic aerosol production during the 2013 Southern Oxidant and Aerosol Study (SOAS). *Environ. Sci. Technol.* **51**, 5026-5034, doi:10.1021/acs.est.6b05750 (2017).
- 7 Pye, H. O. T. *et al.* On the implications of aerosol liquid water and phase separation for organic aerosol mass. *Atmos. Chem. Phys.* **17**, 343-369, doi:10.5194/acp-17-343-2017 (2017).
- 8 Pye, H. O. T. *et al.* Modeling the current and future roles of particulate organic nitrates in the southeastern United States. *Environ. Sci. Technol.* **49**, 14195-14203, doi:10.1021/acs.est.5b03738 (2015).
- 9 Murphy, B. N. *et al.* Semivolatile POA and parameterized total combustion SOA in CMAQv5.2: impacts on source strength and partitioning. *Atmos. Chem. Phys.* **17**, 11107-11133, doi:10.5194/acp-17-11107-2017 (2017).
- 10 Liu, J. *et al.* Regional similarities and NO<sub>x</sub>-related increases in biogenic secondary organic aerosol in summertime southeastern United States. *J. Geophys. Res.-Atmos.* **123**, 6020-6036, doi:10.1029/2018JD028491 (2018).
- 11 Carlton, A. G. *et al.* Model representation of secondary organic aerosol in CMAQv4.7. *Environ. Sci. Technol.* **44**, 8553-8560, doi:10.1021/es100636q (2010).
- 12 Zhang, H. *et al.* Monoterpenes are the largest source of summertime organic aerosol in the southeastern United States. *P. Natl. Acad. Sci. USA* **115**, 2038, doi:10.1073/pnas.1717513115 (2018).

- 13 Pye, H. O. T. *et al.* Anthropogenic enhancements to production of highly oxygenated molecules from autoxidation. *P. Natl. Acad. Sci. USA* **116**, 6641, doi:10.1073/pnas.1810774116 (2019).
- 14 Xu, L. *et al.* Experimental and model estimates of the contributions from biogenic monoterpenes and sesquiterpenes to secondary organic aerosol in the southeastern United States. *Atmos. Chem. Phys.* **18**, 12613-12637, doi:10.5194/acp-18-12613-2018 (2018).
- 15 Lee, B. H. *et al.* Resolving ambient organic aerosol formation and aging pathways with simultaneous molecular composition and volatility observations. *ACS Earth Space Chem.* **4**, 391-402, doi:10.1021/acsearthspacechem.9b00302 (2020).
